# Supplementary material for: Co-supplementation of isomalto-oligosaccharides potentiates metabolic health benefits of polyphenol-rich cranberry extract in high fat diet-fed mice via enhanced gut butyrate production
Source: Springer Nature journal article supplement (doi:10.1007/s00394-017-1561-5), 2017-11-10
Supplement: MOESM1 [file 15213296]

**Co-supplementation of isomalto-oligosaccharides potentiates metabolic health benefits of polyphenol-rich cranberry extract in high fat diet-fed mice *via* enhanced gut butyrate production.**

**European Journal of Nutrition**

Dhirendra Pratap Singh1,2, Shashank Singh1, Vandana Bijalwan1, Vijay Kumar1, Pragyanshu Khare1, Ritesh Kumar Baboota1,3, Paramdeep Singh1, Jagdeep Singh1, Kanthi Kiran Kondepudi1,**, Kanwaljit Chopra2,**, Mahendra Bishnoi1,**

1National Agri-Food Biotechnology Institute (NABI), S.A.S. Nagar (Mohali), Punjab, India-160071

2 Pharmacology Division, University Institute of Pharmaceutical Sciences (UIPS), Panjab University, Chandigarh, India 160014

3 Dept. of Pharmaceutical and Pharmacological Science, Katholieke Universiteit Leuven, Belgium (present address)

****Correspondences:**

**Dr. Mahendra Bishnoi, Ph.D.**

**Dr. Kanthi Kiran Kondepudi, Ph.D.**

E-mail: [mbishnoi@gmail.com](mailto:mbishnoi@gmail.com) (MB); [kiran@nabi.res.in](mailto:kiran@nabi.res.in) (KKK)

**Prof. Kanwaljit Chopra, Ph. D.**

Email: [kanwaljitchopra@yahoo.co.in](mailto:kanwaljitchopra@yahoo.co.in)

**Online resource 1: Composition of high fat diet (58% kcal from fat)**

| **Component** | **For each kg** | **Supplier** |
| --- | --- | --- |
| Normal chow | 365 g | Aashirwad industries, Mohali, Punjab, India |
| Lard | 350 g | Local slaughter house |
| Fat free casein | 250 g | Loba chemie Pvt. Ltd., Mumbai, India |
| Vitamin and mineral mix | 30 g | Virbac animal health India Pvt. Ltd., Mumbai, India |
| yeast extract | 1 g | Himedia Laboratories Pvt, Mumbai, India |
| DL-methionine | 3 g | Himedia Laboratories Pvt, Mumbai, India |
| Sodium chloride | 1 g | Sigma-Aldrich, Saint Louis, MO, USA |
